# Supplementary material
Source: PubMed Central journal article supplement (PMC3503247)
Supplement: NIHMS419604-supplement-1_si_001.pdf [file NIHMS419604-supplement-1_si_001.pdf]

# Supporting Information

For

“Utilizing a Water-Soluble Cryptophane with Fast Xenon Exchange Rates for Picomolar Sensitivity NMR Measurements”

Yubin Bai, P. Aru Hill and Ivan J. Dmochowski\*

*Department of Chemistry, University of Pennsylvania, Philadelphia, Pennsylvania 19104*

## Table of Contents

|                                           |   |
|-------------------------------------------|---|
| HP Xe delivery setup .....                | 2 |
| ITC controls at 310 K .....               | 3 |
| Describing HP Xe depolarization rate..... | 6 |
| 1. HP Xe concentration in sample.....     | 6 |
| 2. Rate of xenon depolarization .....     | 6 |
| 3. Fitting existing Hyper-CEST data.....  | 6 |
| References.....                           | 8 |

## HP Xe delivery setup

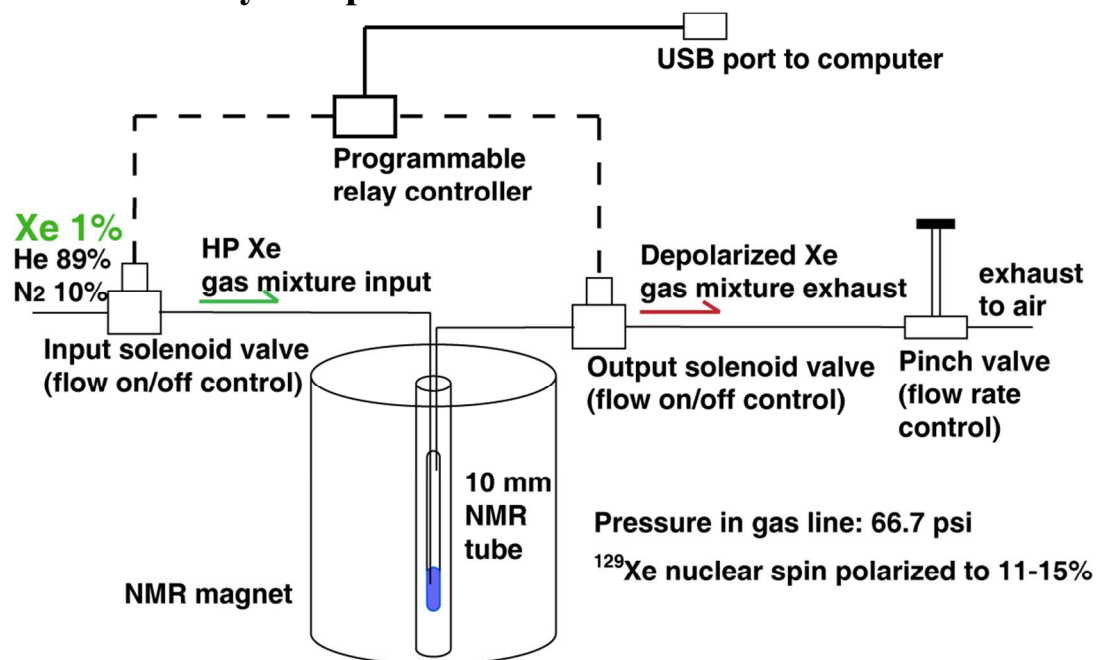

**Figure S1.** HP Xe gas mixture continuous-flow delivery setup.

Typically the flow rate ranges between 0.6 and 0.8 standard liters per minute (SLM). The sample solution is saturated by HP  $^{129}\text{Xe}$  after continuously running the gas line for 20 sec, which is confirmed by monitoring  $^{129}\text{Xe}$  signal intensity using small flip-angle pulses.

## ITC controls at 310 K

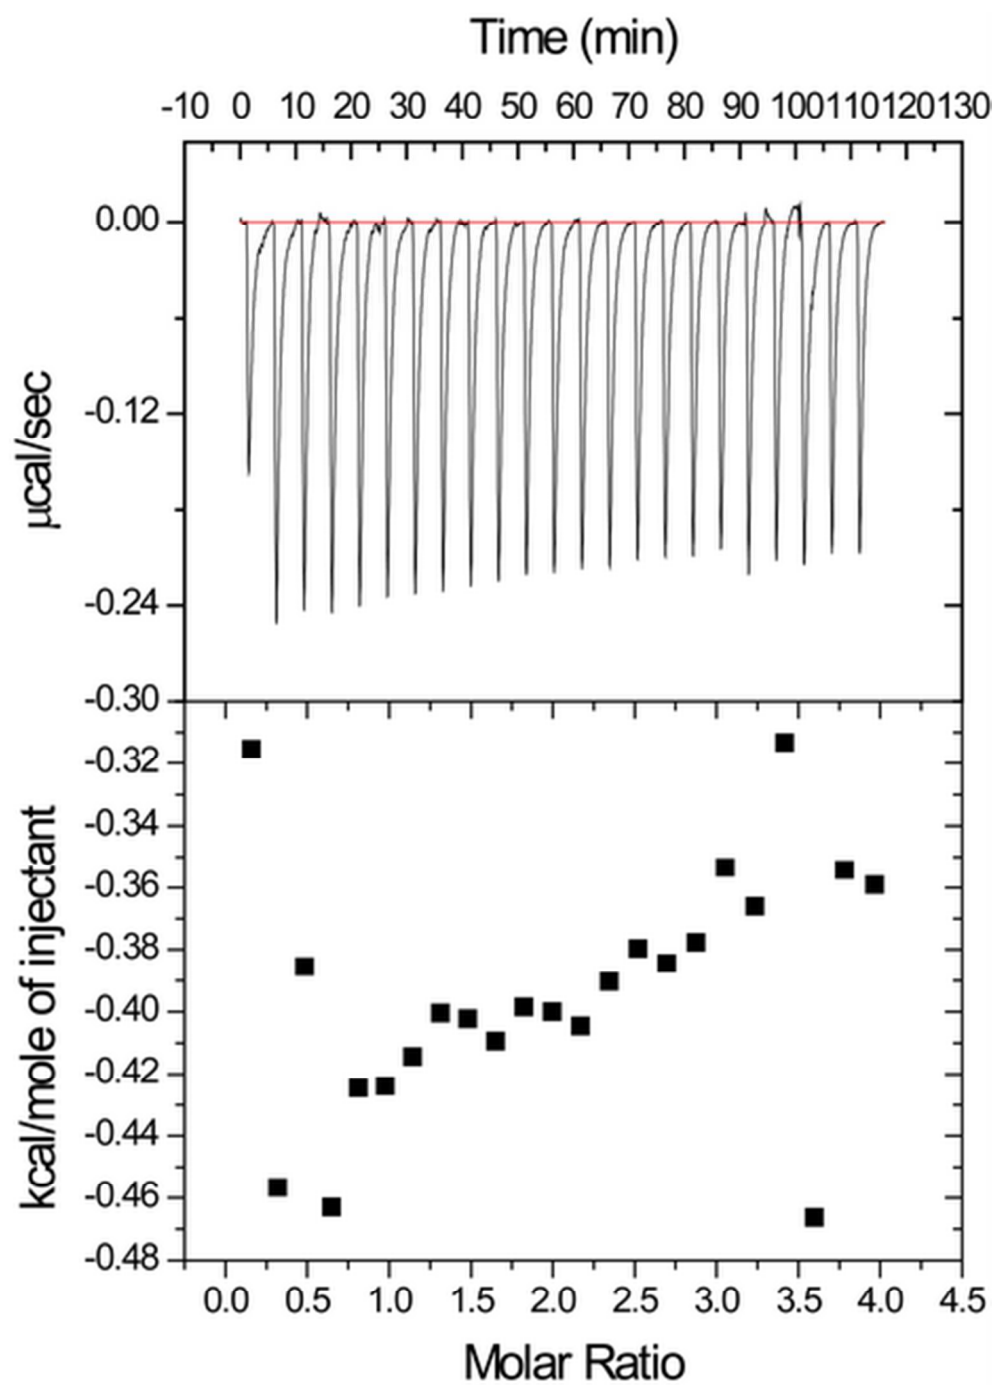

**Figure S2.** ITC buffer controls at 310 K. Water titrated into 20 mM phosphate buffer, pH 7.5.

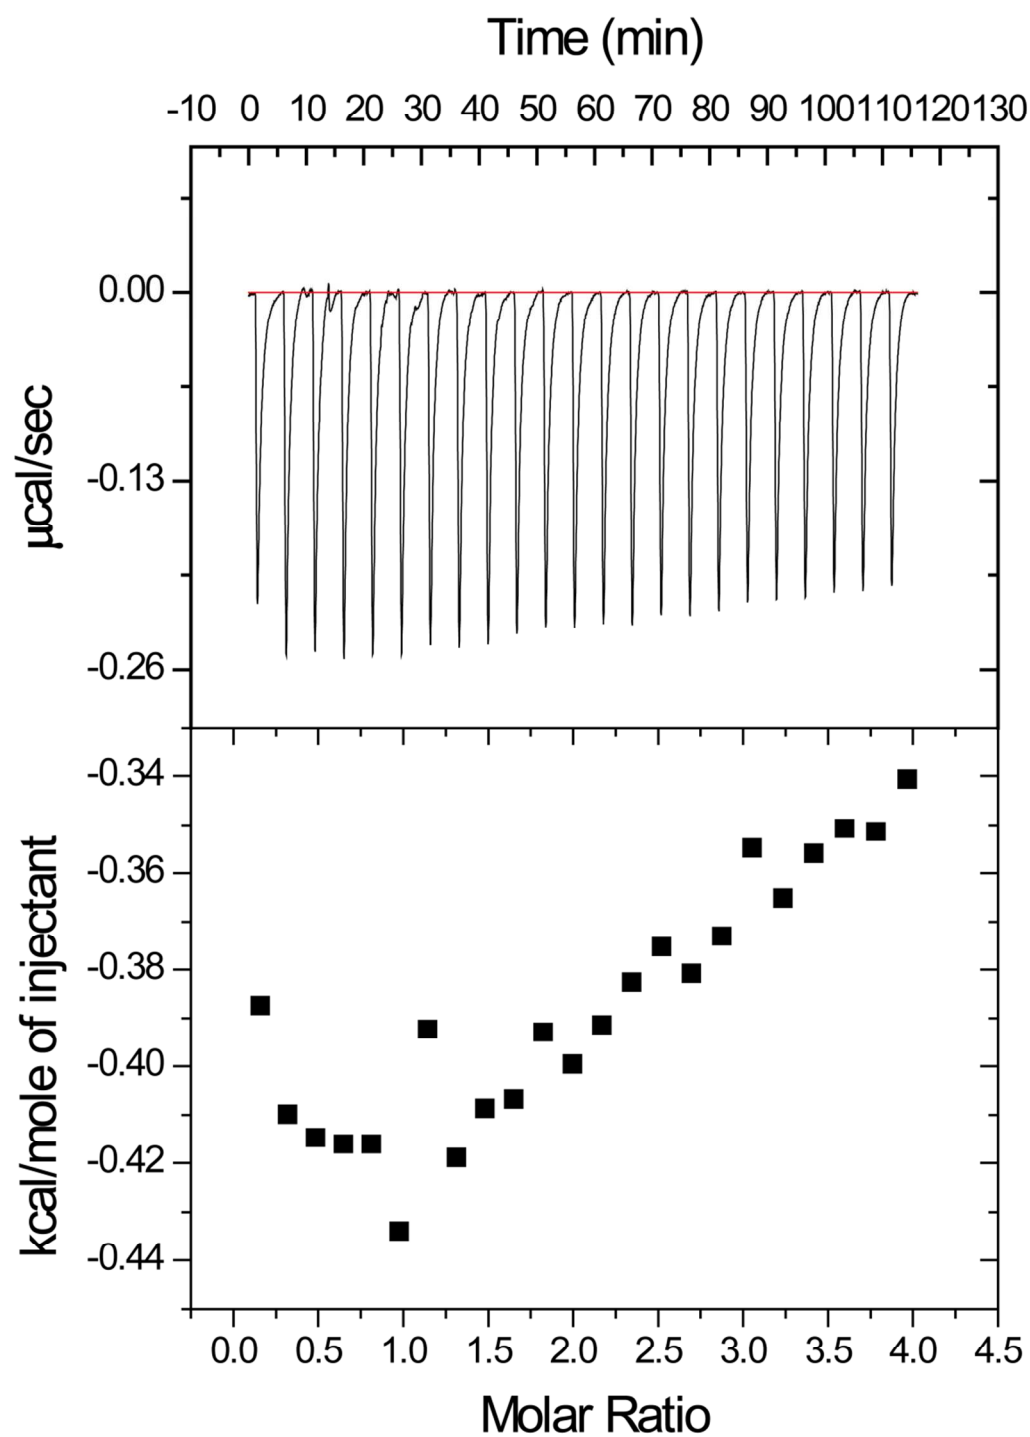

**Figure S3.** ITC buffer controls at 310 K. Water titrated into a solution of 131  $\mu\text{M}$  TAAC in 20 mM phosphate buffer, pH 7.5.

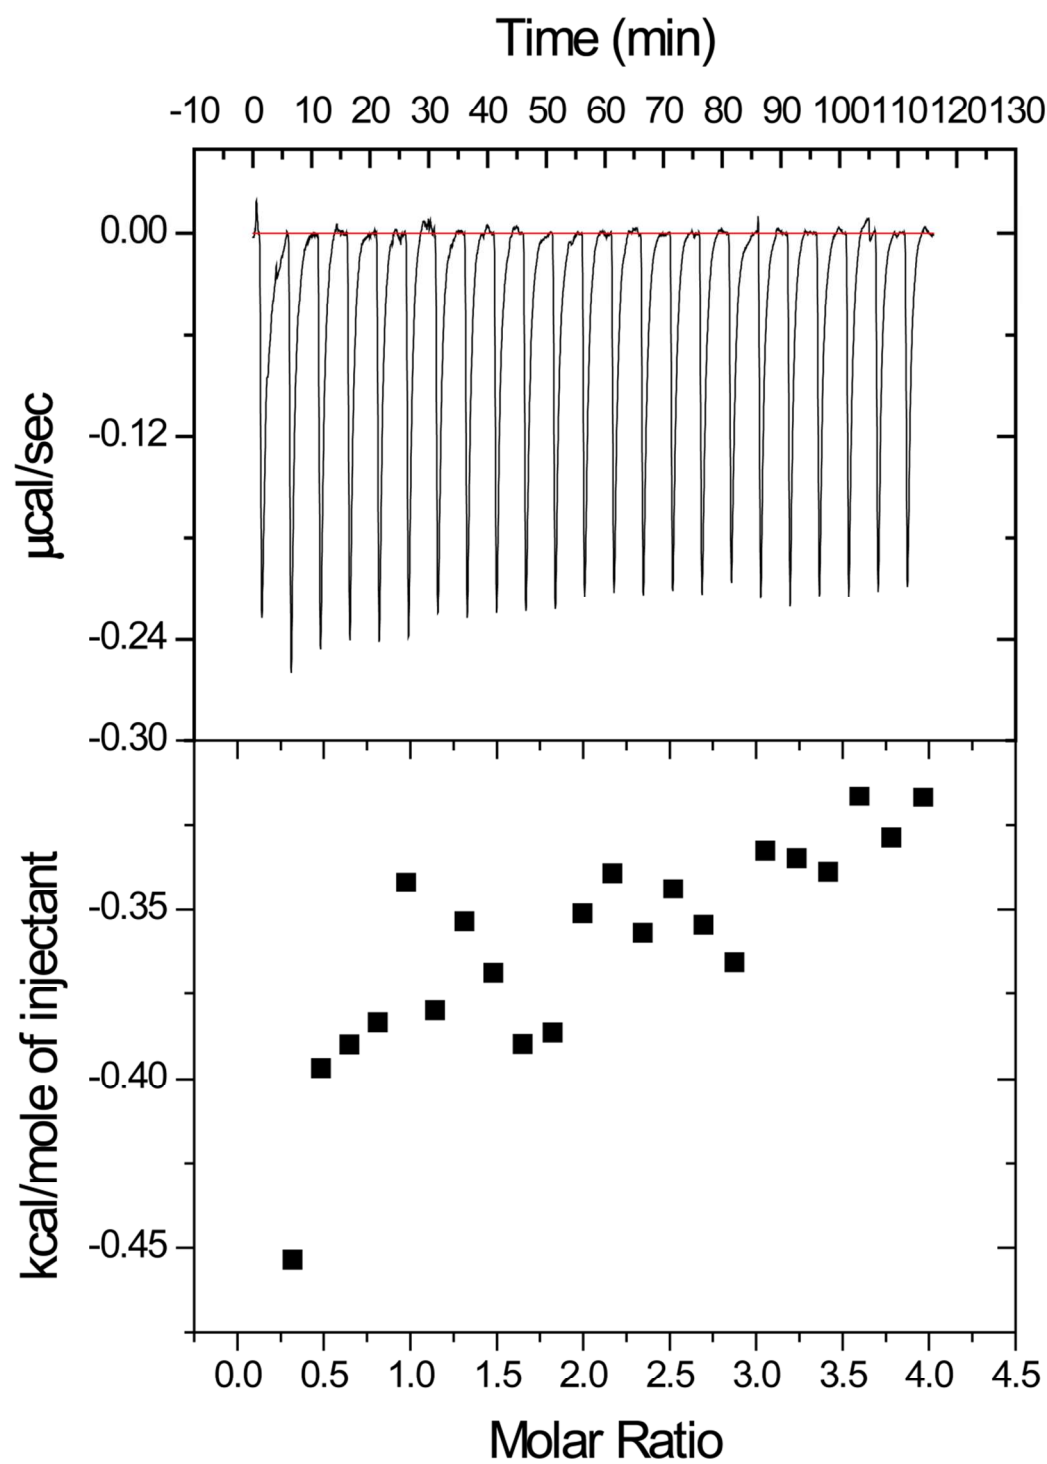

**Figure S4.** ITC buffer controls at 310 K. Xenon-saturated water (3.31 mM) titrated into 20 mM phosphate buffer, pH 7.5.

# Describing HP Xe depolarization rate

## 1. HP Xe concentration in sample

In the Hyper-CEST experiment, the concentration of Xe is estimated as:

$$\text{xenon partial pressure in gas line} \times \text{mole fraction solubility (at 320 K, 1 atm)} \times \text{molarity of water} = 0.045 \times 4.95 \times 10^{-5} \times 55.5 \text{ M} = 0.12 \text{ mM}.$$

With the given isotope abundance (26%), and hyperpolarization level (10%), the HP Xe concentration becomes:

$$0.12 \text{ mM} \times 26\% \times 10\% = 3.1 \text{ } \mu\text{M}.$$

## 2. Rate of xenon depolarization

Various physical-chemical processes are involved in Hyper-CEST-mediated depolarization through TAAC. In the following equations, “Xe\*” stands for hyperpolarized species (difference of “spin down” and “spin up” species). Therefore the first derivative can be approximated by a combination of Hyper-CEST induced depolarization ( $k_{crypt}$ , the first-order rate constant for cryptophane-mediated Xe\* depolarization) and  $T_1$  relaxation ( $k_1$ ).

$$\frac{d[\text{Xe}^*]}{dt} = -k_{crypt}[\text{Xe}^*] - k_1[\text{Xe}^*] \quad (\text{S1})$$

## 3. Fitting existing Hyper-CEST data

As demonstrated, depletion of the hyperpolarized xenon can be modeled using simple first-order kinetics with rate constant  $k$ :

$$-k = -k_{crypt} - k_1$$

Therefore exponential fit for the on-resonance Hyper-CEST curve can provide the total first-order rate constant, as the data in Figure 3 provide the relative HP Xe concentration at different time points of Hyper-CEST polarization transfer.

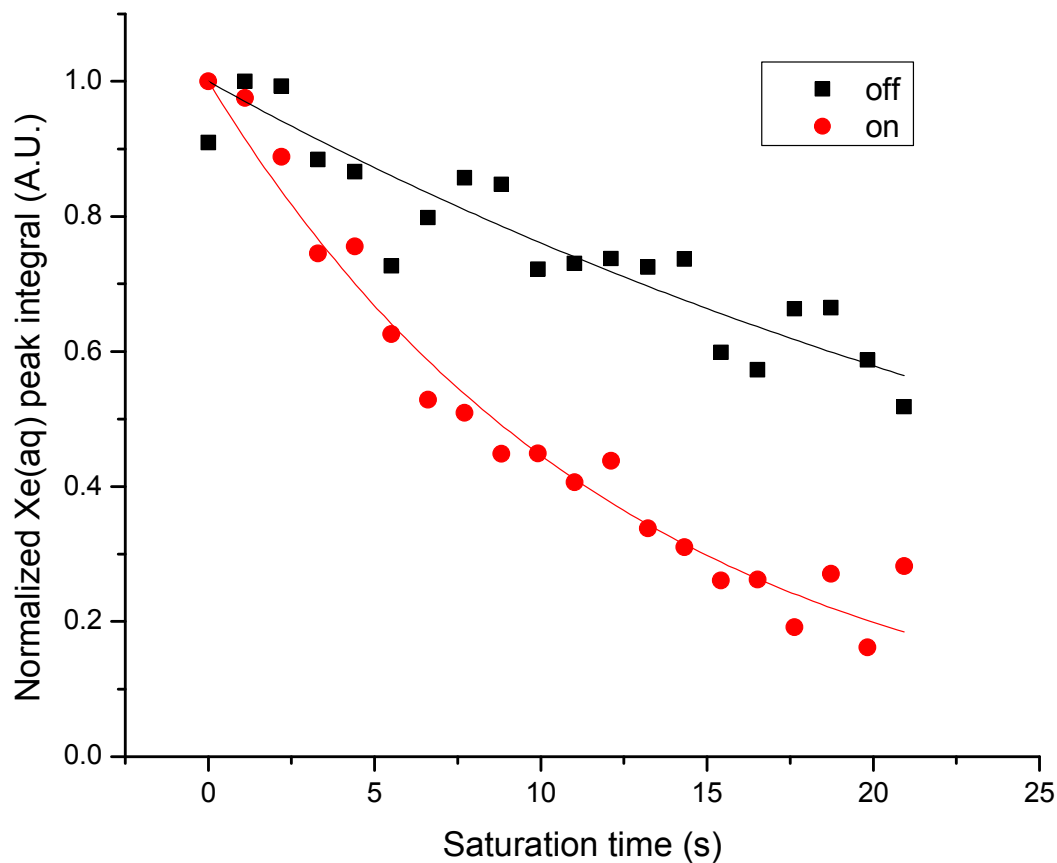

**Figure S5.** Exponential fit on Hyper-CEST mediated HP Xe overall depolarization in 14 pM TAAC solution (another trial, same parameters as Fig 3 in main text). Depolarization lifetimes were fitted to be  $12 \pm 1$  s (on) and  $36 \pm 2$  s (off).

Giving rate constant:

$$-k = -k_{\text{crypt}} - k_1 = -\frac{1}{12} = -0.083 \text{ s}^{-1}$$

The off-resonance  $T_1$  relaxation was fit to be 36 seconds, giving:

$$-k_1 = -\frac{1}{36} = -0.028 \text{ s}^{-1}$$

$$k_{\text{crypt}} = 0.055 \text{ s}^{-1}$$

At time zero of saturation, the HP Xe concentration is:

$$[\text{Xe}^*] = 3.1 \text{ } \mu\text{M}$$

So using 14 pM TAAC and the described pulse sequence, the starting depolarization rate due to the selective saturation is:

$$k_{\text{crypt}}[\text{Xe}^*] = 0.055 \times 3.1 \times 10^{-6} = 0.17 \text{ } \mu\text{M} \cdot \text{s}^{-1}$$

On a per cryptophane basis, the rate becomes:

$$\frac{k_{\text{crypt}}[\text{Xe}^*]}{[\text{TAAC}]} = \frac{0.055 \times 3.1 \times 10^{-6}}{14 \times 10^{-12}} = 1.2 \times 10^4 \text{ s}^{-1}$$

which describes for each cryptophane, twelve thousand Xe-129 atoms get depolarized in a second.

Following similar calculations, the virus capsid biosensor<sup>1</sup> had a 100-fold slower depolarization rate:

$$\frac{k_{\text{crypt}}[\text{Xe}^*]}{[\text{TAAC}]} = \frac{0.0046 \times 2.5 \times 10^{-6}}{125 \times 0.7 \times 10^{-12}} = 1.3 \times 10^2 \text{ s}^{-1}$$

## References

(1) Meldrum, T.; Seim, K. L.; Bajaj, V. S.; Palaniappan, K. K.; Wu, W.; Francis, M. B.; Wemmer, D. E.; Pines, A. *J. Am. Chem. Soc.* **2010**, *132*, 5936.
